# Supplementary material for: Room temperature synthesis of manganese oxide quantum dots and their application as a fluorescent probe for the detection of metal ions in aqueous media
Source: Royal Society of Chemistry journal article supplement (doi:10.1039/c6ra23604a), 2016-01-01
Supplement: c6ra23604a1.pdf [file c6ra23604a1.pdf]

## **Electronic Supplementary Information (ESI)**

### **Room temperature synthesis of manganese oxide quantum dots and its application as fluorescent probe for the detection of metal ion in aqueous media**

Shaopeng Rong <sup>ab</sup>, Pengyi Zhang <sup>\*ab</sup>, Yajie Yang <sup>a</sup>, Fang Liu <sup>a</sup>

<sup>a</sup> State Key Joint Laboratory of Environment Simulation and Pollution Control, School of Environment, Tsinghua University, Beijing 100084, China.

<sup>b</sup> Beijing Key Laboratory of Indoor Air Quality Evaluation and Control, Beijing 100084, P.R. China

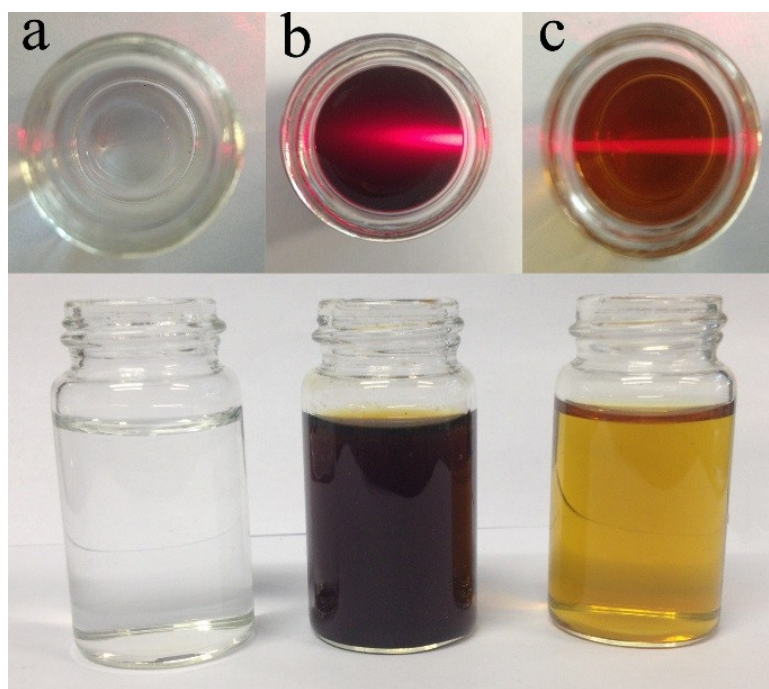

**Fig. S1.** The Tyndall effect photograph of (a) water,  $\text{MnO}_2$  nanosheets colloidal suspension (b) before and (c) after centrifugal treatment.

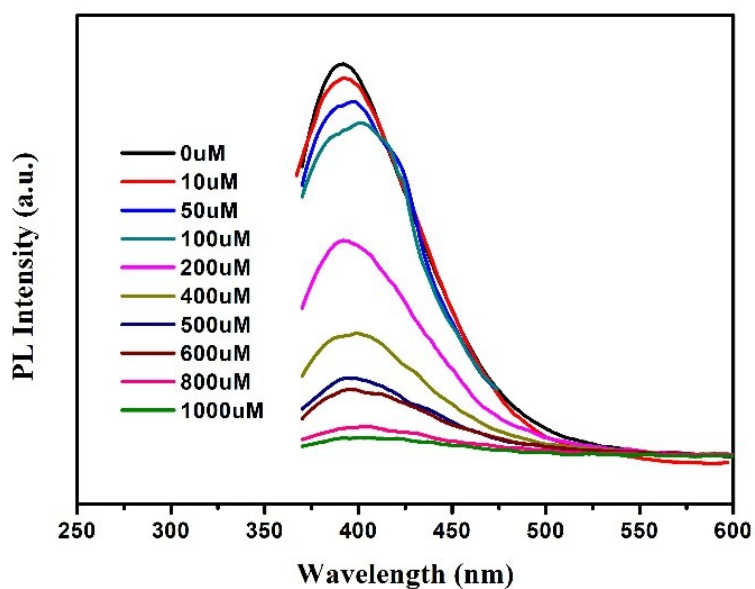

**Fig. S2.** The PL spectra of the MOQDs complex in the presence of different concentrations of  $\text{Fe}^{3+}$ .

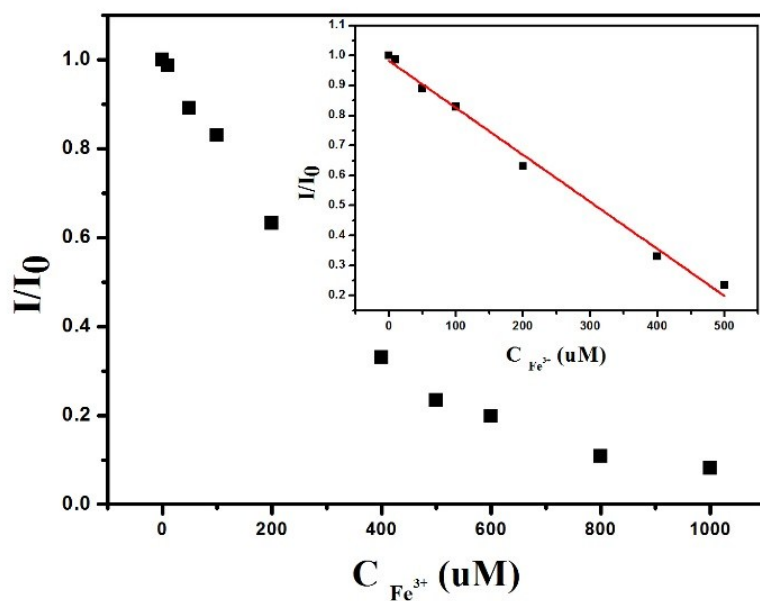

**Fig. S3.** The PL intensity ratios ( $I/I_0$ ) of MOQDs at 320 nm as a function of  $Fe^{3+}$  concentration. Inset is a linear region.  $I$  and  $I_0$  stand for the intensities of MOQDs in the presence and absence of  $Fe^{3+}$ , respectively.

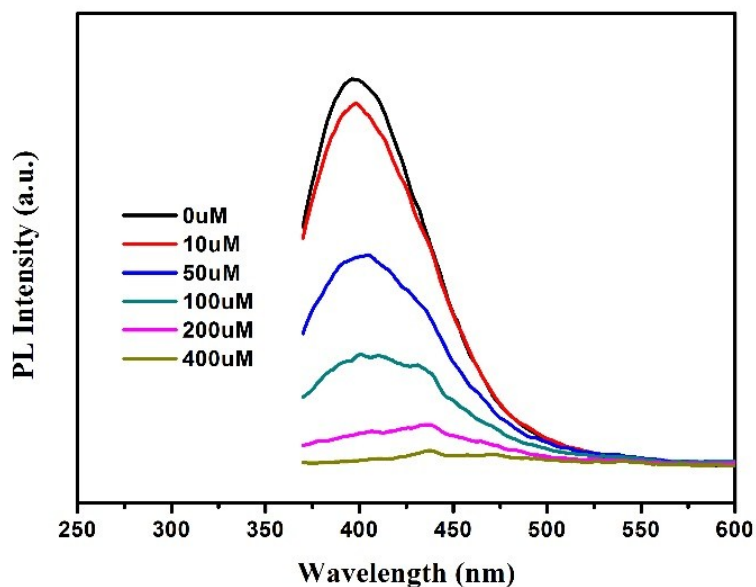

**Fig. S4.** The PL spectra of the MOQDs complex in the presence of different concentrations of  $Mn^{2+}$ .

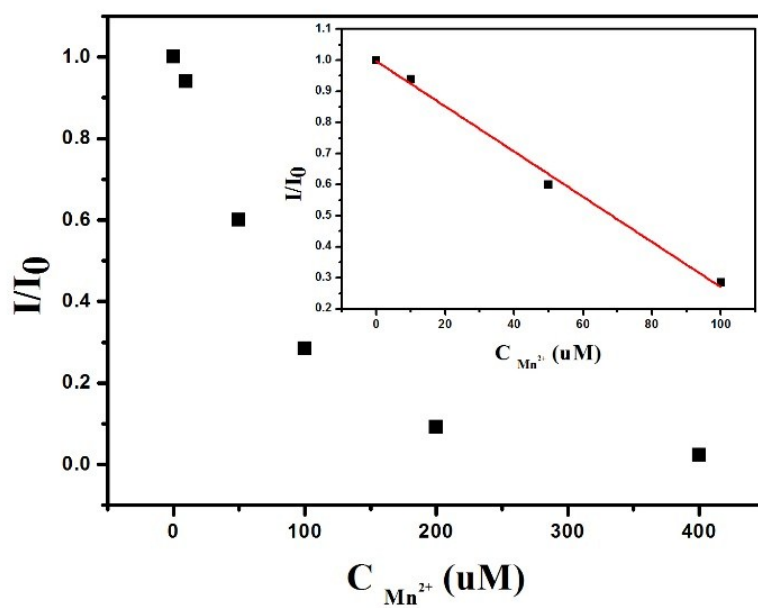

**Fig. S5.** The PL intensity ratios ( $I/I_0$ ) of MOQDs at 320 nm as a function of  $Mn^{2+}$  concentration. Inset is a linear region.  $I$  and  $I_0$  stand for the intensities of MOQDs in the presence and absence of  $Mn^{2+}$ , respectively
